# Supplementary material
Source: PubMed Central journal article supplement (PMC3659988)
Supplement: supp_2012.071449_2012_071449-Contributions.pdf [file supp_2012.071449_2012_071449-Contributions.pdf]

**Manuscript no. HAEMATOL/2012/071449 entitled “Reproducibility of the World Health Organization 2008 criteria for myelodysplastic syndromes”**

**Authors: Leonor Senent, Leonor Arenillas, Elisa Luño, Juan Carlos Ruiz, Guillermo Sanz, Lourdes Florensa.**

**Information about the contributions of each person named as having participated in the study**

- 1) Guarantor(s), i.e., person(s) who is (are) responsible for the integrity of the work as a whole:
- Leonor Senent. Servicio de Hematología, Hospital Universitario La Fe, Valencia, Spain
  - Leonor Arenillas Laboratori de Citologia Hematològica, Servei de Patologia, Hospital del Mar, GRETNHE, IMIM (Hospital del Mar Research Institute), Barcelona, SPAIN
  - Guillermo Sanz, Servicio de Hematología, Hospital Universitario La Fe, Valencia, Spain

According to the International Committee of Medical Journal Editors (ICMJE) ([http://www.icmje.org/ethical\\_1author.html](http://www.icmje.org/ethical_1author.html)): “Authorship credit should be based on: 1) substantial contributions to conception and design, acquisition of data, or analysis and interpretation of data; 2) drafting the article or revising it critically for important intellectual content; and 3) final approval of the version to be published. Authors should meet conditions 1, 2, and 3 ..... Acquisition of funding, collection of data, or general supervision of the research group alone does not constitute authorship”.

**The guarantors of this manuscript confirm that all persons designated as authors qualify for authorship, and that each author has participated sufficiently in the work to take public responsibility for appropriate portions of the content.**

**2) Authors who participated in the conception of the study: Leonor Senent, Leonor Arenillas, Elisa Luño, Guillermo Sanz, Lourdes Florensa**

**3) Design & Methods. The following authors were responsible for specific investigations (please detail):**

- Collection of samples: Leonor Senent, Leonor Arenillas, and Lourdes Florensa.
- Morphological review: Leonor Senent, Leonor Arenillas, and Lourdes Florensa, Elisa Luño
- Statistical analysis: Juan Carlos Ruiz.

**4) Results. The following authors were responsible for specific portions of the results, including figures and tables:**

Data interpretation: All authors.

**5) Writing the manuscript. The following authors were responsible for writing the manuscript:**

- Manuscript writing: Leonor Senent, Leonor Arenillas, and Lourdes Florensa, Elisa Luño, Guillermo Sanz
- Final approval of manuscript: All authors

**6) Contributors Listed in Acknowledgments:** The authors wish to thank Dr. Ignacio Lorenzo for his helpful comments on statistical issues and Luis Benlloch for data management.

This work was supported in part by research funding from “RTICC” (Red Temática de Investigación Cooperativa en Cáncer, RD06/0020/0031, RD07/0020/2004), Instituto de Salud Carlos III, Ministerio de Sanidad y Consumo, Spain (FI07/00107; PI07/1009 and PI 11/02010); SGR 541 (“Agència de Gestió d’Ajuts Universitaris i de Recerca”, “Departament d’Innovació, Universitats i Empresa”) y COST-European Genetic and Epigenetic Study on AML and MDS (BM080).
